# Supplementary material for: The modulation effect of auxiliary ligands on photochromic properties of 3D naphthalene diimide coordination polymers
Source: Royal Society of Chemistry journal article supplement (doi:10.1039/d2dt03480h), 2022-11-30
Supplement: d2dt03480h1.pdf [file d2dt03480h1.pdf]

## Supporting Information (SI)

# The modulation effect of auxiliary ligands on photochromic properties of 3D naphthalene diimide coordination polymers

Shimin Zhang, Weiyu Yu, Pengfei Hao,\* Gaopeng Li, Junju Shen and Yunlong Fu\*

*Key Laboratory of Magnetic Molecules & Magnetic Information Materials Ministry of Education, School of Chemical and Material Science, Shanxi Normal University, Taiyuan 030031, China*

*E- mail: haopengfei\_2015@126.com; yunlongfu@sxnu.edu.cn*

### Content

|                                                                                                                                   |   |
|-----------------------------------------------------------------------------------------------------------------------------------|---|
| 1. Figures .....                                                                                                                  | 2 |
| <b>Fig. S1</b> The Chem Draw type diagram of NicNDI ligands (NicNDI = (3-pyridylacetyl-amino)-1,4,5,8-naphthalene diimide) .....  | 2 |
| <b>Fig. S2</b> TGA curve of <b>1</b> (a) and <b>2</b> (b).....                                                                    | 2 |
| <b>Fig. S3</b> The optical band gaps of NicNDI ligand (black), <b>1</b> (red) and <b>2</b> (green) .....                          | 2 |
| <b>Fig. S4</b> The UV-vis absorption spectra of the original sample and decolorations sample of <b>1</b> .<br>.....               | 3 |
| <b>Fig. S5</b> The coloration-decoloration processes with repeated UV irradiation/heating of <b>1</b> . ....                      | 3 |
| <b>Fig. S6</b> Powder X-ray diffraction (PXRD) patterns of <b>1</b> , <b>1P</b> , <b>2</b> and <b>2P</b> at room temperature..... | 3 |
| <b>Fig. S7</b> IR spectra of <b>1</b> , <b>1P</b> , <b>2</b> and <b>2P</b> .....                                                  | 4 |
| 2. Tables.....                                                                                                                    | 4 |
| <b>Table S1</b> Crystallographic data and refinement parameters of <b>1</b> and <b>2</b> . ....                                   | 4 |
| <b>Table S2</b> Selected bond lengths (Å) and angles (°) of <b>1</b> and <b>2</b> . ....                                          | 5 |
| <b>Table S3</b> Hydrogen bonds of <b>1</b> and <b>2</b> (Å and °). ....                                                           | 5 |

## 1. Figures

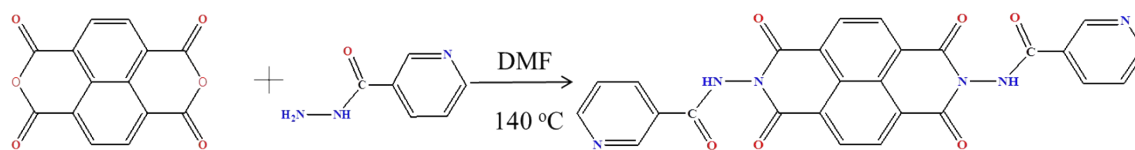

**Fig. S1** The Chem Draw type diagram of NicNDI ligands (NicNDI = (3-pyridylacylamino)-1,4,5,8-naphthalene diimide)

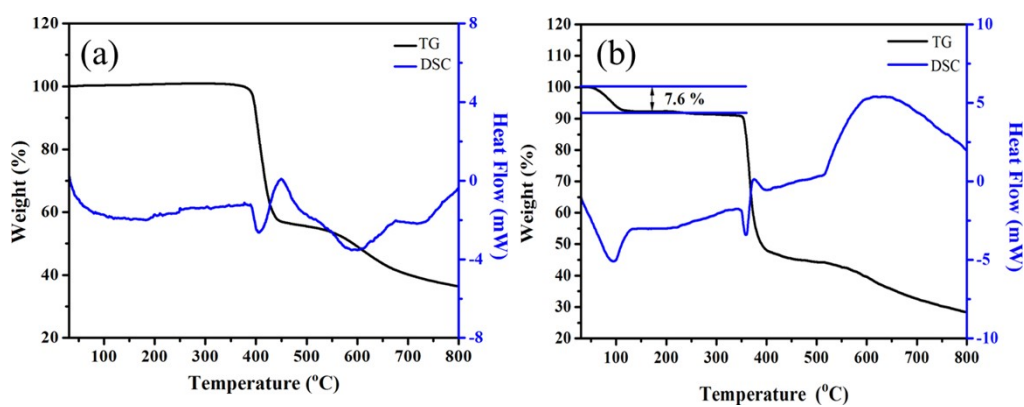

**Fig. S2** TGA curve of 1 (a) and 2 (b).

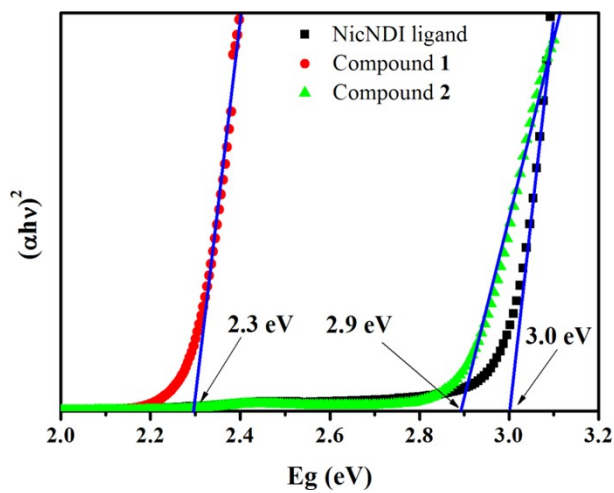

**Fig. S3** The optical band gaps of NicNDI ligand (black), 1 (red) and 2 (green)

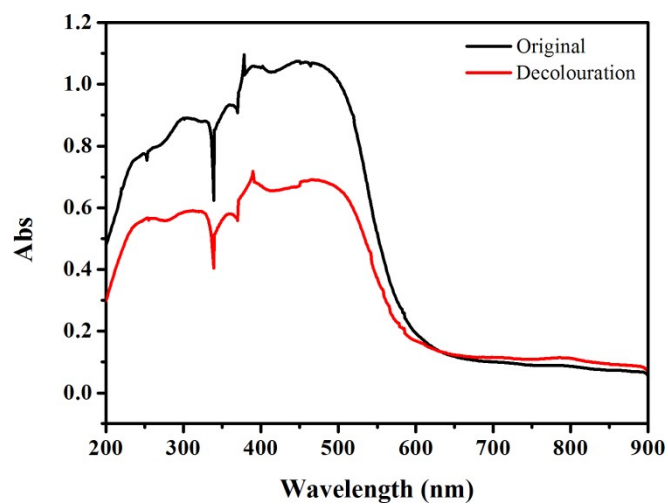

Fig. S4 The UV-vis absorption spectra of the original sample and decolourations sample of **1**.

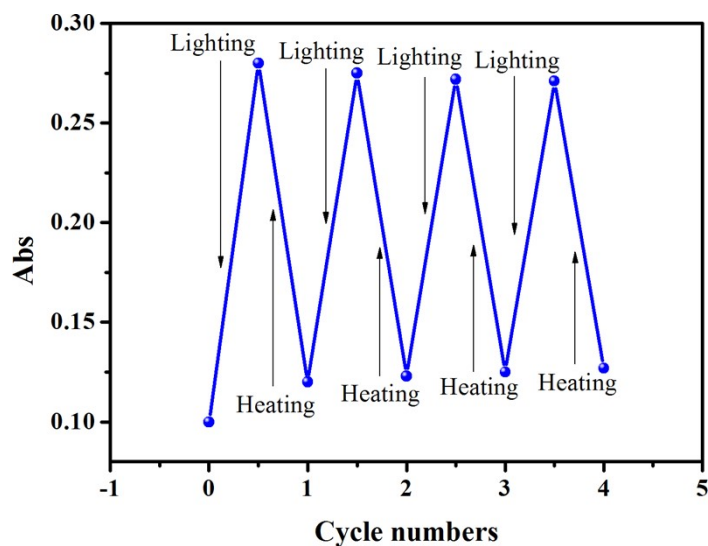

Fig. S5 The coloration-decoloration processes with repeated UV irradiation/heating of **1**.

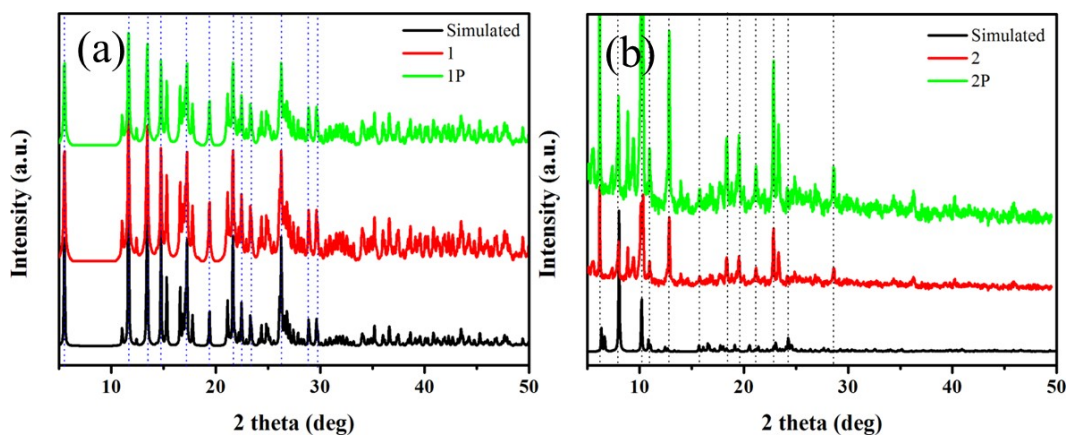

Fig. S6 Powder X-ray diffraction (PXRD) patterns of **1**, **1P**, **2** and **2P** at room temperature.

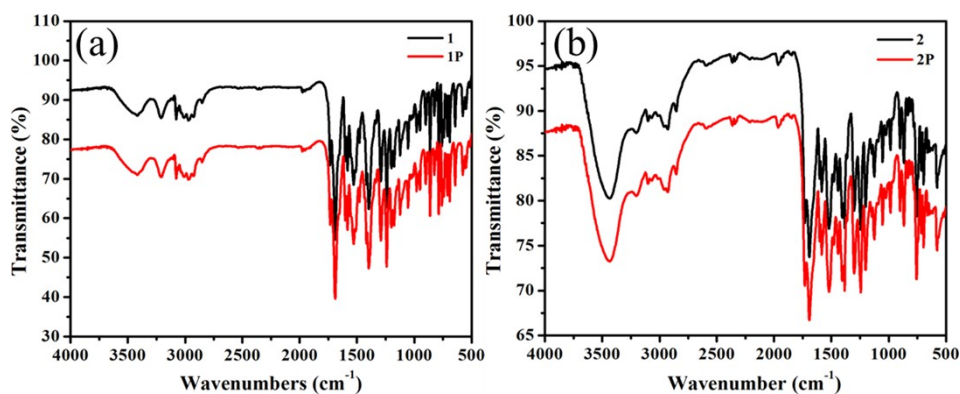

Fig. S7 IR spectra of **1**, **1P**, **2** and **2P**.

## 2. Tables

**Table S1** Crystallographic data and refinement parameters of **1** and **2**.

| Compound                                                                                              | <b>1</b>                                                         | <b>2</b>                                                         |
|-------------------------------------------------------------------------------------------------------|------------------------------------------------------------------|------------------------------------------------------------------|
| Empirical formula                                                                                     | C <sub>42</sub> H <sub>24</sub> CdN <sub>6</sub> O <sub>10</sub> | C <sub>40</sub> H <sub>22</sub> CdN <sub>6</sub> O <sub>10</sub> |
| Formula weight                                                                                        | 885.07                                                           | 859.03                                                           |
| Temperature (K)                                                                                       | 293(2)                                                           | 293(2)                                                           |
| Crystal system                                                                                        | monoclinic                                                       | monoclinic                                                       |
| Space group                                                                                           | <i>C2/c</i>                                                      | <i>C2/c</i>                                                      |
| <i>a</i> (Å)                                                                                          | 34.294(2)                                                        | 17.3232(19)                                                      |
| <i>b</i> (Å)                                                                                          | 7.2986(6)                                                        | 28.428(3)                                                        |
| <i>c</i> (Å)                                                                                          | 15.2539(13)                                                      | 18.805(3)                                                        |
| $\alpha$ (°)                                                                                          | 90                                                               | 90                                                               |
| $\beta$ (°)                                                                                           | 110.932(2)                                                       | 112.765(3)                                                       |
| $\gamma$ (°)                                                                                          | 90                                                               | 90                                                               |
| <i>V</i> (Å <sup>3</sup> )                                                                            | 3566.1(5)                                                        | 8539.4(19)                                                       |
| <i>Z</i>                                                                                              | 4                                                                | 8                                                                |
| <i>D<sub>c</sub></i> (g cm <sup>-3</sup> )                                                            | 1.649                                                            | 1.336                                                            |
| $\mu$ (mm <sup>-1</sup> )                                                                             | 0.687                                                            | 0.571                                                            |
| <i>F</i> (000)                                                                                        | 1784.0                                                           | 3456.0                                                           |
| Crystal size/mm <sup>3</sup>                                                                          | 0.846 × 0.246 × 0.173                                            | 0.137 × 0.108 × 0.04                                             |
| Radiation                                                                                             | MoK $\alpha$ ( $\lambda$ = 0.71073)                              | MoK $\alpha$ ( $\lambda$ = 0.71073)                              |
| $\vartheta$ range (°)                                                                                 | 5.724 to 56.714                                                  | 4.326 to 56.836                                                  |
| Reflections collected                                                                                 | 25587                                                            | 63082                                                            |
| Unique reflections                                                                                    | 4465                                                             | 10679                                                            |
| <i>R</i> <sub>int</sub>                                                                               | 0.0769                                                           | 0.0896                                                           |
| Data/restraints/parameters                                                                            | 4465/0/267                                                       | 10679/0/514                                                      |
| Goodness-of-fit on <i>F</i> <sup>2</sup>                                                              | 1.055                                                            | 1.046                                                            |
| <i>R</i> <sub>1</sub> / <i>wR</i> <sub>2</sub> , [ <i>I</i> ≥ 2 $\sigma$ ( <i>I</i> )] <sup>a,b</sup> | 0.0485/0.0996                                                    | 0.0792/0.2374                                                    |
| <i>R</i> <sub>1</sub> / <i>wR</i> <sub>2</sub> , (all data)                                           | 0.0873/0.1121                                                    | 0.1399/0.2693                                                    |
| $\Delta\rho_{\max}/\Delta\rho_{\min}$ (e Å <sup>-3</sup> )                                            | 1.33/-0.58                                                       | 1.97/-1.00                                                       |

**Table S2** Selected bond lengths (Å) and angles (°) of **1** and **2**.

| Compound 1                                                                                       |            |                                      |            |
|--------------------------------------------------------------------------------------------------|------------|--------------------------------------|------------|
| Cd1-N1 <sup>1</sup>                                                                              | 2.305(3)   | Cd1-O1 <sup>1</sup>                  | 2.376(2)   |
| Cd1-N1                                                                                           | 2.305(3)   | Cd1-O1                               | 2.376(2)   |
| Cd1-O2                                                                                           | 2.281(2)   | Cd1-O2 <sup>1</sup>                  | 2.281(2)   |
| N1 <sup>1</sup> -Cd1-N1                                                                          | 87.36(13)  | O2 <sup>1</sup> -Cd1-N1 <sup>1</sup> | 143.57(9)  |
| N1 <sup>1</sup> -Cd1-O1 <sup>1</sup>                                                             | 93.07(8)   | O2 <sup>1</sup> -Cd1-N1              | 91.13(9)   |
| N1 <sup>1</sup> -Cd1-O1                                                                          | 118.38(8)  | O2 <sup>1</sup> -Cd1-O1              | 98.05(8)   |
| N1-Cd1-O1                                                                                        | 93.07(8)   | O2-Cd1-O1                            | 56.17(8)   |
| N1-Cd1-O1 <sup>1</sup>                                                                           | 118.37(8)  | O2 <sup>1</sup> -Cd1-O1 <sup>1</sup> | 56.17(8)   |
| O1 <sup>1</sup> -Cd1-O1                                                                          | 137.11(11) | O2-Cd1-O1 <sup>1</sup>               | 98.05(8)   |
| O2-Cd1-N1 <sup>1</sup>                                                                           | 91.13(9)   | O2-Cd1-O2 <sup>1</sup>               | 110.51(13) |
| O2-Cd1-N1                                                                                        | 143.58(9)  |                                      |            |
| symmetry codes: <sup>1</sup> -x,+y,1/2-z; <sup>2</sup> -x,1-y,1-z; <sup>3</sup> 1/2-x,-1/2-y,1-z |            |                                      |            |
| Compound 2                                                                                       |            |                                      |            |
| Cd1-O1                                                                                           | 2.266(5)   | Cd1-O7                               | 2.455(4)   |
| Cd1-O9 <sup>1</sup>                                                                              | 2.263(4)   | Cd1-O10 <sup>1</sup>                 | 2.444(4)   |
| Cd1-N1                                                                                           | 2.297(4)   | Cd1-N2                               | 2.317(4)   |
| O1-Cd1-O7                                                                                        | 54.97(14)  | O1-Cd1-O10 <sup>1</sup>              | 99.74(15)  |
| O1-Cd1-N1                                                                                        | 137.24(16) | O1-Cd1-N2                            | 88.66(17)  |
| O9 <sup>1</sup> -Cd1-O1                                                                          | 112.25(18) | O91-Cd1-O7                           | 104.14(16) |
| O9 <sup>1</sup> -Cd1-N1                                                                          | 90.81(17)  | O91-Cd1-O10 <sup>1</sup>             | 55.13(14)  |
| O9 <sup>1</sup> -Cd1-N2                                                                          | 140.59(18) | O10 <sup>1</sup> -Cd1-O7             | 141.55(14) |
| N1-Cd1-O7                                                                                        | 85.43(15)  | N1-Cd1-O10 <sup>1</sup>              | 122.76(15) |
| N2-Cd1-O7                                                                                        | 115.12(17) | N2-Cd1-O10 <sup>1</sup>              | 89.68(16)  |
| symmetry codes: <sup>1</sup> -x,+y,1/2-z; <sup>2</sup> -x,1-y,1-z; <sup>3</sup> 1/2-x,-1/2-y,1-z |            |                                      |            |

**Table S3** Hydrogen bonds of **1** and **2** (Å and °).

| Compound 1                                                                                       |        |          |          |        |
|--------------------------------------------------------------------------------------------------|--------|----------|----------|--------|
| D-H...A                                                                                          | d(D-H) | d(H...A) | d(D...A) | <(DHA) |
| N2-H2...O1 <sup>1</sup>                                                                          | 0.86   | 2.09     | 2.909(4) | 157.9  |
| symmetry codes: <sup>1</sup> -x,+y,1/2-z; <sup>2</sup> -x,1-y,1-z; <sup>3</sup> 1/2-x,-1/2-y,1-z |        |          |          |        |
| Compound 2                                                                                       |        |          |          |        |
| D-H...A                                                                                          | d(D-H) | d(H...A) | d(D...A) | <(DHA) |
| N3-H3...O10 <sup>1</sup>                                                                         | 0.86   | 1.93     | 2.752(7) | 158.5  |
| N5-H5...O7 <sup>2</sup>                                                                          | 0.86   | 1.99     | 2.807(7) | 159.3  |
| symmetry codes: <sup>1</sup> -x,+y,1/2-z; <sup>2</sup> -x,1-y,1-z; <sup>3</sup> 1/2-x,-1/2-y,1-z |        |          |          |        |
